# Supplementary material
Source: publisher figshare collection journal article supplement (https://acs.figshare.com/ndownloader/files/13114070)

# Trace Phosphate Improves ZIC-pHILIC Peak Shape, Sensitivity, and Coverage for Untargeted Metabolomics

Jonathan L. Spalding<sup>1,2,3,≠</sup>, Fuad J. Naser<sup>1,≠</sup>, Nathaniel G. Mahieu<sup>1</sup>, Stephen L. Johnson<sup>2</sup>, and Gary J. Patti<sup>\*1,3</sup>

- 1. Department of Chemistry, Washington University in St. Louis, St. Louis, USA
- 2. Department of Genetics, Washington University in St. Louis, St. Louis, USA
- 3. Department of Medicine, Washington University in St. Louis, St. Louis, USA

≠ These authors contributed equally to this work  
\* To whom correspondence should be addressed: gjpattij@wustl.edu

## Table of Contents

Table S1: List of chemical standards.....2-3

Table S2: Log*P* values and neutral charge states of chemical standards.....4

Table S3: Table of chromatographic conditions tested for preliminary method optimization.....5

Figure S1: Standard chromatographic performance with and without phosphate present.....6

Figure S2: Effects of sample solvent composition on polar compound solubility.....7

Figure S3: EICs of standards whose chromatographic classification was changed by phosphate.....8-15

Figure S4: Isomer resolution with and without phosphate present .....16

Figure S5: Standard peak shape with phosphate in injection solvent compared to mobile phase.....17

Figure S6: Standards’ chromatographic performance with and with phosphate in injection solvent.....18

Figure S7: Trace phosphate effects on ionization efficiency measured via direct infusion.....19

Figure S8: 2-PG from *E. coli* extracts is *credentialed* only when phosphate is present.....20

Figure S9: Chromatographic performance of 10 metabolites detected in *E. coli*.....21

Figure S10: Chromatographic performance of 2-PG injected after standalone phosphate injection.....22

Figure S11: Average peak height of standards as a function of increasing mobile phase salt.....23

**Table S1.** List of the 65 chemical standards and their suppliers.

| <b>Standard</b>                 | <b>Supplier</b>                             |
|---------------------------------|---------------------------------------------|
| 1,3-dicaffeoylquinic acid       | Sigma Aldrich (St. Louis, MO, USA)          |
| 2-deoxyglucose                  | Sigma Aldrich (St. Louis, MO, USA)          |
| 2-deoxyglucose 6-phosphate      | Sigma Aldrich (St. Louis, MO, USA)          |
| 2-hydroxyglutarate              | Sigma Aldrich (St. Louis, MO, USA)          |
| 2'-deoxyguanosine               | Santa Cruz Biotechnology (Dallas, TX, USA)  |
| 2-phosphoglycerate              | Sigma Aldrich (St. Louis, MO, USA)          |
| 3'-deoxyguanosine               | Cayman Chemical (Ann Arbor, MI, USA)        |
| 3-phosphoglycerate              | Sigma Aldrich (St. Louis, MO, USA)          |
| Acetylcholine                   | Santa Cruz Biotechnology (Dallas, TX, USA)  |
| Adenine                         | Sigma Aldrich (St. Louis, MO, USA)          |
| Adenosine                       | Sigma Aldrich (St. Louis, MO, USA)          |
| Adipic acid dihydrazide         | Sigma Aldrich (St. Louis, MO, USA)          |
| Adenosine 5'-diphosphate        | Sigma Aldrich (St. Louis, MO, USA)          |
| $\alpha$ -Ketoglutarate         | Sigma Aldrich (St. Louis, MO, USA)          |
| Adenosine 5'-monophosphate      | Cayman Chemical (Ann Arbor, MI, USA)        |
| Arginine                        | Sigma Aldrich (St. Louis, MO, USA)          |
| Adenosine 5'-triphosphate       | Sigma Aldrich (St. Louis, MO, USA)          |
| Biotin                          | Sigma Aldrich (St. Louis, MO, USA)          |
| Butylamine                      | Sigma Aldrich (St. Louis, MO, USA)          |
| Butyrate                        | Sigma Aldrich (St. Louis, MO, USA)          |
| Chelidamic acid                 | Sigma Aldrich (St. Louis, MO, USA)          |
| Choline                         | Sigma Aldrich (St. Louis, MO, USA)          |
| Cidofovir                       | Sigma Aldrich (St. Louis, MO, USA)          |
| Citrate                         | Sigma Aldrich (St. Louis, MO, USA)          |
| Cyanocobalamin                  | Sigma Aldrich (St. Louis, MO, USA)          |
| Cyclohexylammonium              | Sigma Aldrich (St. Louis, MO, USA)          |
| D-myoinositol 4-monophosphate   | Sigma Aldrich (St. Louis, MO, USA)          |
| Dopamine                        | Sigma Aldrich (St. Louis, MO, USA)          |
| Ethylenediaminetetraacetic acid | Sigma Aldrich (St. Louis, MO, USA)          |
| Epinephrine                     | Sigma Aldrich (St. Louis, MO, USA)          |
| Ethanolamine                    | Sigma Aldrich (St. Louis, MO, USA)          |
| Folic acid                      | Sigma Aldrich (St. Louis, MO, USA)          |
| Fucose 1-phosphate              | Sigma Aldrich (St. Louis, MO, USA)          |
| Fumaric acid                    | Sigma Aldrich (St. Louis, MO, USA)          |
| gamma-Aminobutyric acid         | Sigma Aldrich (St. Louis, MO, USA)          |
| Galactose                       | Sigma Aldrich (St. Louis, MO, USA)          |
| Geneticin                       | Thermo Fisher Scientific (Waltham, MA, USA) |
| Glucose                         | Sigma Aldrich (St. Louis, MO, USA)          |
| Glutathione                     | Sigma Aldrich (St. Louis, MO, USA)          |
| Guanidine                       | Sigma Aldrich (St. Louis, MO, USA)          |

|                                  |                                            |
|----------------------------------|--------------------------------------------|
| Guanine                          | Sigma Aldrich (St. Louis, MO, USA)         |
| Histamine                        | Sigma Aldrich (St. Louis, MO, USA)         |
| Iris 7-ys carboxylic acid        | Sigma Aldrich (St. Louis, MO, USA)         |
| Isocitrate                       | Sigma Aldrich (St. Louis, MO, USA)         |
| Kanamycin                        | Sigma Aldrich (St. Louis, MO, USA)         |
| L-Ascorbic acid 2-sulfate        | Sigma Aldrich (St. Louis, MO, USA)         |
| Lysine                           | Sigma Aldrich (St. Louis, MO, USA)         |
| N,N,N-Trimethyphenylammonium     | Santa Cruz Biotechnology (Dallas, TX, USA) |
| Neryl pyrophosphate lithium salt | Sigma Aldrich (St. Louis, MO, USA)         |
| p-Aminohippuric acid             | Sigma Aldrich (St. Louis, MO, USA)         |
| Palmitoyl-CoA                    | Santa Cruz Biotechnology (Dallas, TX, USA) |
| Phosphoenolpyruvate              | Sigma Aldrich (St. Louis, MO, USA)         |
| Phenethylamine                   | Santa Cruz Biotechnology (Dallas, TX, USA) |
| Piperazine                       | Santa Cruz Biotechnology (Dallas, TX, USA) |
| Putrescine                       | Sigma Aldrich (St. Louis, MO, USA)         |
| Pyruvate                         | Sigma Aldrich (St. Louis, MO, USA)         |
| Serotonin                        | Sigma Aldrich (St. Louis, MO, USA)         |
| Sodium-p-toluene-sulfinate       | Santa Cruz Biotechnology (Dallas, TX, USA) |
| Spermine                         | Sigma Aldrich (St. Louis, MO, USA)         |
| Streptomycin                     | Sigma Aldrich (St. Louis, MO, USA)         |
| Taurocholic acid                 | Sigma Aldrich (St. Louis, MO, USA)         |
| Toluene                          | Sigma Aldrich (St. Louis, MO, USA)         |
| Uracil                           | Sigma Aldrich (St. Louis, MO, USA)         |
| Uridine                          | Sigma Aldrich (St. Louis, MO, USA)         |
| Vidarabine                       | Sigma Aldrich (St. Louis, MO, USA)         |

**Table S2:** Log*P* values and neutral charge states of 65 chemical standards. Isomeric compounds are highlighted in the same color. For our analyses, all standards were mixed such that each had a concentration of approximately 20  $\mu$ M.

| Compound                | Neutral Charge State | Log P | Compound                          | Neutral Charge State | Log P |
|-------------------------|----------------------|-------|-----------------------------------|----------------------|-------|
| Geneticin               | 4                    | -1.37 | Uracil                            | 0                    | -0.71 |
| Kanamycin               | 4                    | -4.81 | Uridine                           | 0                    | -1.61 |
| Spermine                | 4                    | -0.96 | Vidarabine                        | 0                    | -1.02 |
| Streptomycin            | 3                    | -2.53 | 1,3-dicaffeoylquinic acid         | -1                   | 1.64  |
| Adipic acid dihydrazide | 2                    | -2.67 | Biotin                            | -1                   | 0.12  |
| Putrescine              | 2                    | -0.72 | Butyrate                          | -1                   | 0.78  |
| Acetylcholine           | 1                    | -3.9  | Cidofovir                         | -1                   | -3.37 |
| Arginine                | 1                    | -1.79 | Glutathione                       | -1                   | -0.87 |
| Butylamine              | 1                    | 0.93  | p-Aminohippuric acid              | -1                   | N/A   |
| Choline                 | 1                    | -3.7  | Pyruvate                          | -1                   | -1.24 |
| Cyclohexylammonium      | 1                    | 1.39  | Sodium-p-toluene-sulfonate        | -1                   | 0.93  |
| Dopamine                | 1                    | 0.12  | Taurocholic acid                  | -1                   | 0.05  |
| Epinephrine             | 1                    | -0.63 | 2-deoxyglucose 6-phosphate        | -2                   | -3.24 |
| Ethanolamine            | 1                    | -1.31 | 2-hydroxyglutarate (2-HG)         | -2                   | -1.45 |
| Guanidine               | 1                    | -1.81 | ADP                               | -2                   | -2.91 |
| Histamine               | 1                    | -0.92 | $\alpha$ -Ketoglutarate           | -2                   | -1.43 |
| Lysine                  | 1                    | -1.04 | AMP                               | -2                   | -0.22 |
| Trimethyphenylammonium  | 1                    | -2.31 | Chelidamic acid                   | -2                   | -1.43 |
| Phenethylamine          | 1                    | 1.46  | D-myoinositol 4-monophosphate     | -2                   | -1.4  |
| Piperazine              | 1                    | -1.17 | Folic acid                        | -2                   | -2.48 |
| Serotonin               | 1                    | 0.21  | Fucose 1-phosphate                | -2                   | -0.56 |
| 2-deoxyglucose (2-DG)   | 0                    | -1.46 | Fumaric acid                      | -2                   | -0.01 |
| 2'-deoxyguanosine       | 0                    | -1.36 | Iris 7- <i>ws</i> carboxylic acid | -2                   | N/A   |
| 3'-deoxyguanosine       | 0                    | -0.72 | L-Ascorbic acid 2-sulfate         | -2                   | N/A   |
| Adenine                 | 0                    | -2.12 | Neryl pyrophosphate               | -2                   | 1.1   |
| Adenosine               | 0                    | -1.02 | 2-phosphoglycerate (2-PG)         | -3                   | -2.49 |
| Cyanocobalamin          | 0                    | -6    | 3-phosphoglycerate (3-PG)         | -3                   | -1.88 |
| GABA                    | 0                    | -0.64 | ATP                               | -3                   | -4.18 |
| Galactose               | 0                    | -3.17 | Citrate                           | -3                   | -1.72 |
| Glucose                 | 0                    | -3.17 | EDTA                              | -3                   | -0.43 |
| Guanine                 | 0                    | -0.98 | Isocitrate                        | -3                   | -1.47 |
| Toluene                 | 0                    | 2.68  | Phosphoenolpyruvate (PEP)         | -3                   | -1.23 |
|                         |                      |       | Palmitoyl-CoA                     | -4                   | 3.54  |

**Table S3.** Chromatographic conditions tested for preliminary method optimization on ZIC-pHILIC. A total of 12 conditons were tested on 65 chemical standards.

| <b>Salt Type</b>     | <b>Salt Concentrations (mM)</b> | <b>pH</b> |
|----------------------|---------------------------------|-----------|
| Ammonium Acetate     | 10, 20                          | 4.0, 7.0  |
| Ammonium Formate     | 10, 20                          | 4.0, 7.0  |
| Ammonium Bicarbonate | 10, 20                          | 7.0, 9.3  |

**Figure S1.** Heatmap of standard chromatographic performance on ZIC-pHILIC stationary phase with and without 5  $\mu$ M ammonium phosphate in the aqueous fraction of the mobile phase (in addition to 20 mM ammonium acetate). Compounds that were analyzed in negative mode for all experiments contain a superscript (-) by their name while those that were analyzed in positive mode contain a superscript (+). Compounds were only analyzed with the ionization mode in which they ionized better so as to remove redundant data. The addition of phosphate to the mobile phase yields substantial improvements in separations. Refer to Figure 4 for details regarding color coding.

| Standard                             | Neutral charge state | ZIC-pHILIC with phos | ZIC-pHILIC no phos | Standard                                       | Neutral charge state | ZIC-pHILIC with phos | ZIC-pHILIC no phos |
|--------------------------------------|----------------------|----------------------|--------------------|------------------------------------------------|----------------------|----------------------|--------------------|
| Geneticin <sup>+</sup>               | 4                    |                      |                    | Uracil <sup>+</sup>                            | 0                    |                      |                    |
| Kanamycin <sup>+</sup>               | 4                    |                      |                    | Uridine <sup>+</sup>                           | 0                    |                      |                    |
| Spermine <sup>+</sup>                | 4                    |                      |                    | Vidarabine <sup>+</sup>                        | 0                    |                      |                    |
| Streptomycin <sup>+</sup>            | 3                    |                      |                    | 1,3-dicaffeoylquinic acid <sup>-</sup>         | -1                   |                      |                    |
| Adipic acid dihydrazide <sup>+</sup> | 2                    |                      |                    | Biotin <sup>-</sup>                            | -1                   |                      |                    |
| Putrescine <sup>+</sup>              | 2                    |                      |                    | Butyrate <sup>-</sup>                          | -1                   |                      |                    |
| Acetylcholine <sup>+</sup>           | 1                    |                      |                    | Cidofovir <sup>+</sup>                         | -1                   |                      |                    |
| Arginine <sup>+</sup>                | 1                    |                      |                    | Glutathione <sup>-</sup>                       | -1                   |                      |                    |
| Butylamine <sup>+</sup>              | 1                    |                      |                    | p-Aminohippuric acid <sup>+</sup>              | -1                   |                      |                    |
| Choline <sup>+</sup>                 | 1                    |                      |                    | Pyruvate <sup>-</sup>                          | -1                   |                      |                    |
| Cyclohexylammonium <sup>+</sup>      | 1                    |                      |                    | Sodium-p-toluene-sulfinate <sup>-</sup>        | -1                   |                      |                    |
| Dopamine <sup>+</sup>                | 1                    |                      |                    | Taurocholic acid <sup>-</sup>                  | -1                   |                      |                    |
| Epinephrine <sup>+</sup>             | 1                    |                      |                    | 2-deoxyglucose 6-phosphate <sup>-</sup>        | -2                   |                      |                    |
| Ethanolamine <sup>+</sup>            | 1                    |                      |                    | 2-hydroxyglutarate (2-HG) <sup>-</sup>         | -2                   |                      |                    |
| Guanidine <sup>+</sup>               | 1                    |                      |                    | ADP <sup>-</sup>                               | -2                   |                      |                    |
| Histamine <sup>+</sup>               | 1                    |                      |                    | $\alpha$ -Ketoglutarate <sup>-</sup>           | -2                   |                      |                    |
| Lysine <sup>+</sup>                  | 1                    |                      |                    | AMP <sup>-</sup>                               | -2                   |                      |                    |
| Trimethyphenylammonium <sup>+</sup>  | 1                    |                      |                    | Chelidamic acid <sup>-</sup>                   | -2                   |                      |                    |
| Phenethylamine <sup>+</sup>          | 1                    |                      |                    | D-myoinositol 4-monophosphate <sup>-</sup>     | -2                   |                      |                    |
| Piperazine <sup>+</sup>              | 1                    |                      |                    | Folic acid <sup>-</sup>                        | -2                   |                      |                    |
| Serotonin <sup>+</sup>               | 1                    |                      |                    | Fucose 1-phosphate <sup>-</sup>                |                      |                      |                    |
| 2-deoxyglucose (2-DG) <sup>-</sup>   | 0                    |                      |                    | Fumaric acid <sup>-</sup>                      | -2                   |                      |                    |
| 2'-deoxyguanosine <sup>+</sup>       | 0                    |                      |                    | Iris 7- <i>ws</i> carboxylic acid <sup>-</sup> | -2                   |                      |                    |
| 3'-deoxyguanosine <sup>+</sup>       | 0                    |                      |                    | L-Ascorbic acid 2-sulfate <sup>-</sup>         | -2                   |                      |                    |
| Adenine <sup>+</sup>                 | 0                    |                      |                    | Neryl pyrophosphate <sup>-</sup>               | -2                   |                      |                    |
| Adenosine <sup>+</sup>               | 0                    |                      |                    | 2-phosphoglycerate (2-PG) <sup>-</sup>         | -3                   |                      |                    |
| Cyanocobalamin <sup>-</sup>          | 0                    |                      |                    | 3-phosphoglycerate (3-PG) <sup>-</sup>         | -3                   |                      |                    |
| GABA <sup>+</sup>                    | 0                    |                      |                    | ATP <sup>-</sup>                               | -3                   |                      |                    |
| Galactose <sup>-</sup>               | 0                    |                      |                    | Citrate <sup>-</sup>                           | -3                   |                      |                    |
| Glucose <sup>-</sup>                 | 0                    |                      |                    | EDTA <sup>-</sup>                              | -3                   |                      |                    |
| Guanine <sup>+</sup>                 | 0                    |                      |                    | Isocitrate <sup>-</sup>                        | -3                   |                      |                    |
| Toluene <sup>-</sup>                 | 0                    |                      |                    | Phosphoenolpyruvate (PEP) <sup>-</sup>         | -3                   |                      |                    |
|                                      |                      |                      |                    | Palmitoyl-CoA <sup>-</sup>                     | -4                   |                      |                    |

**Figure S2.** Effects of sample solvent composition on polar compound solubility. Metabolite extracts from *E. coli* were resuspended in acetonitrile:water with increasing proportions of acetonitrile (50%: green EIC, 67%: blue EIC, 80%: red EIC) to examine the effects of sample solvent composition on peak shape and polar analyte solubility. The EICs for two important polar compounds, citrate/isocitrate (top) and ADP (bottom) are shown. For citrate/isocitrate, acetonitrile proportions above 67% do not improve peak shape and significantly reduce its solubility, while ADP goes undetected at 80% acetonitrile. Samples were normalized by *E. coli* dry mass. Citrate and isocitrate could not be resolved and are therefore designated as citrate/isocitrate.

### EIC of Citrate/Isocitrate

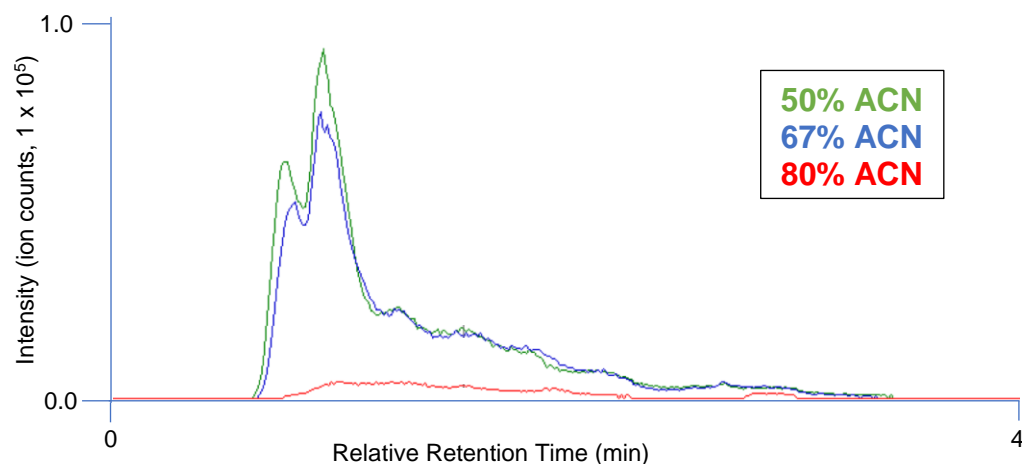

### EIC of ADP

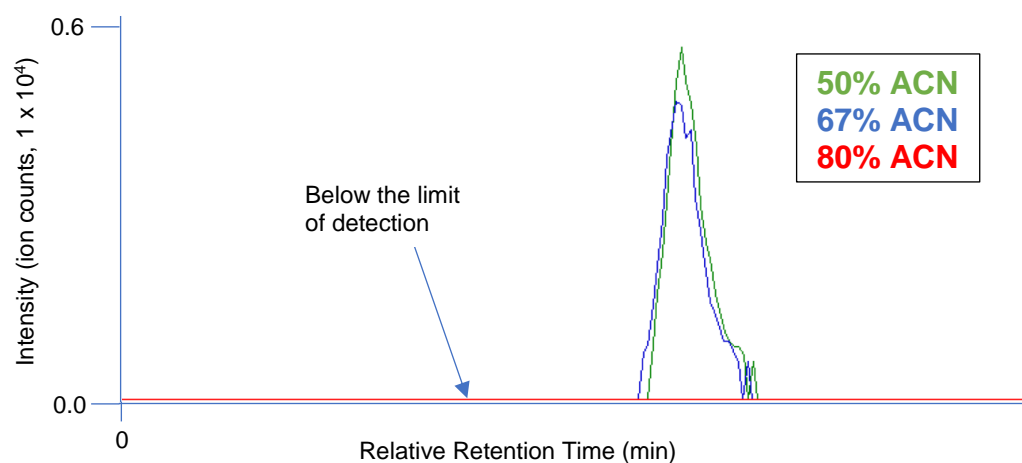

**Figure S3.** EICs of standards whose peak shape classification was changed by phosphate. Green peaks are those detected when 5  $\mu$ M phosphate was present in the mobile phase, and red peaks are those detected without phosphate present.

A.) Adipic acid dihydrazide

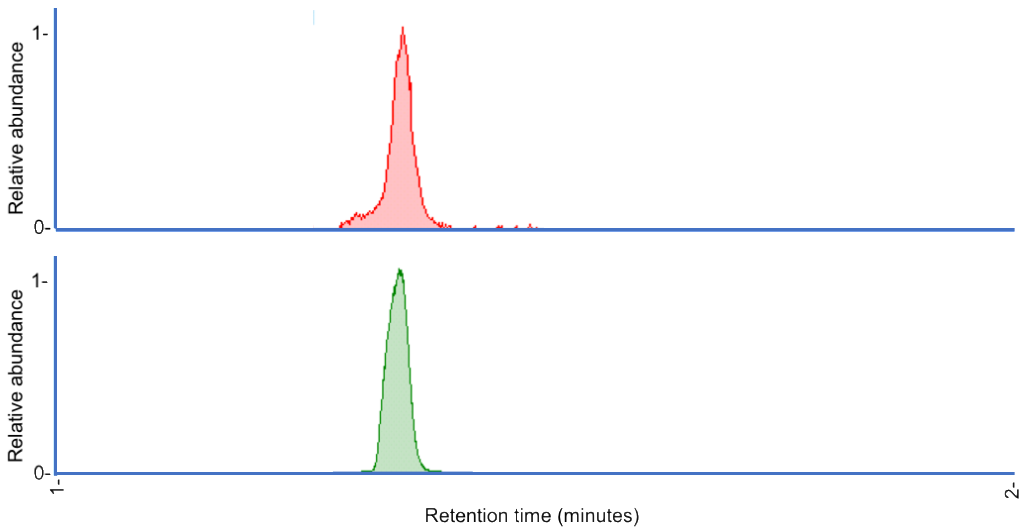

B.) Acetylcholine

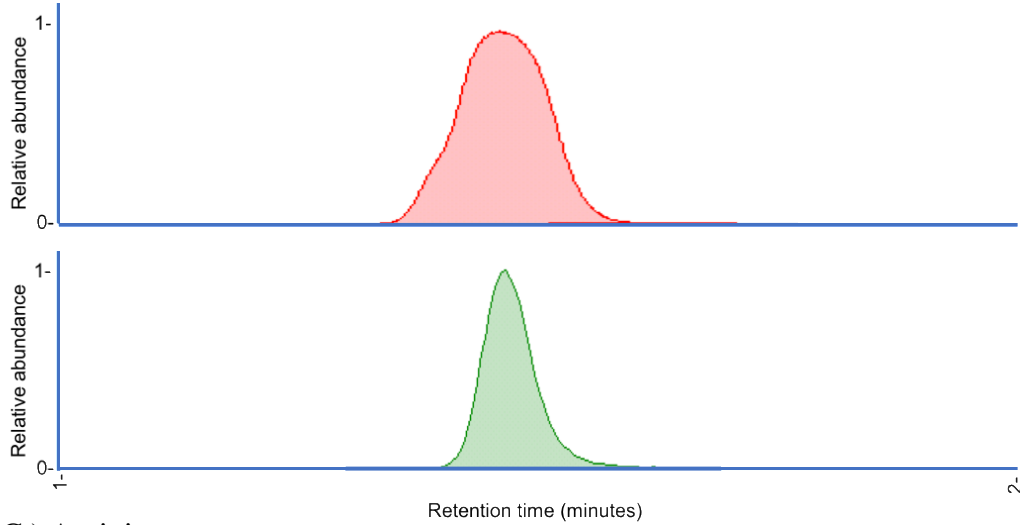

C.) Arginine

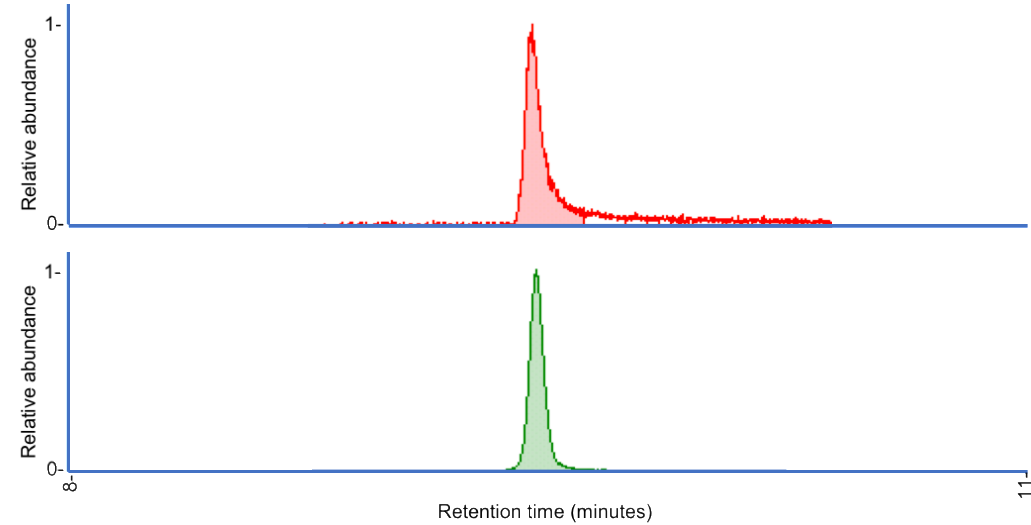



D.) Dopamine

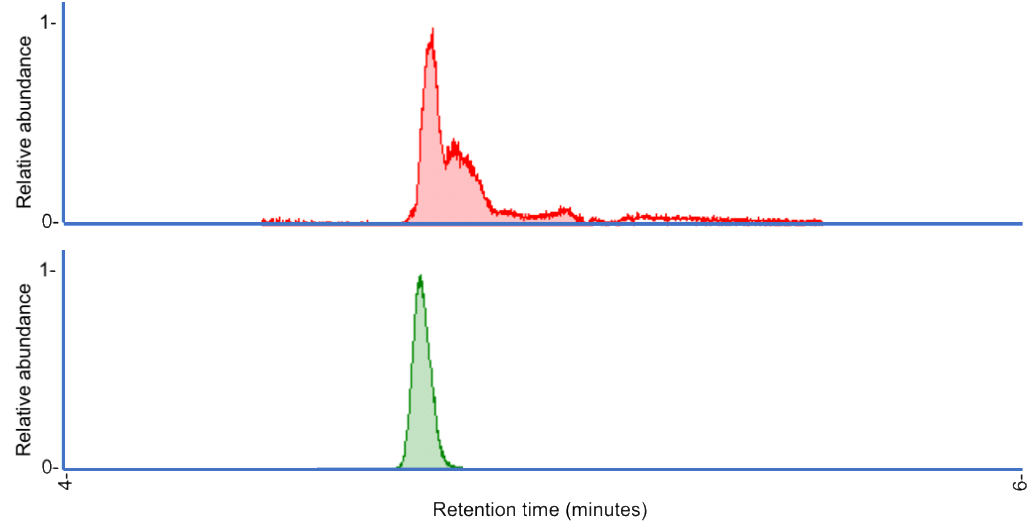

E.) Epinephrine

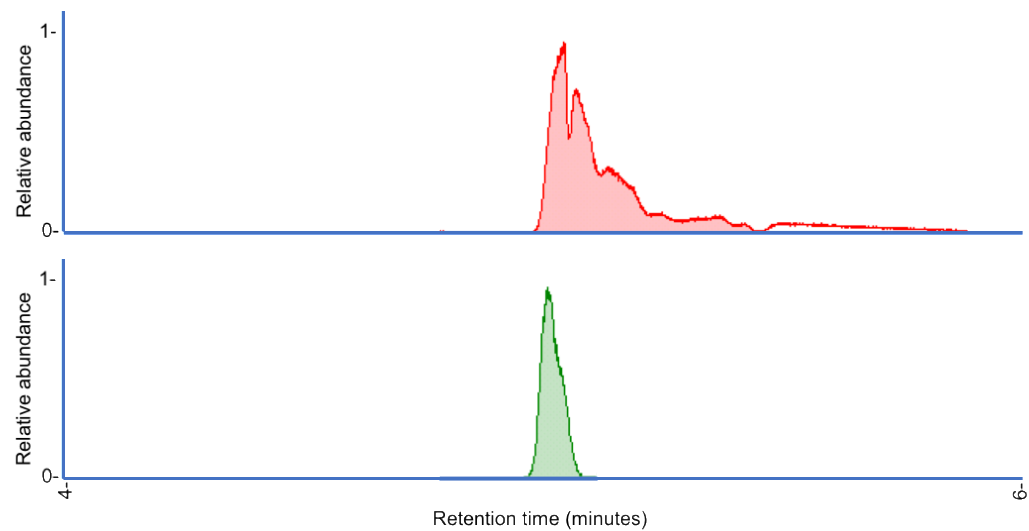

F.) Guanidine

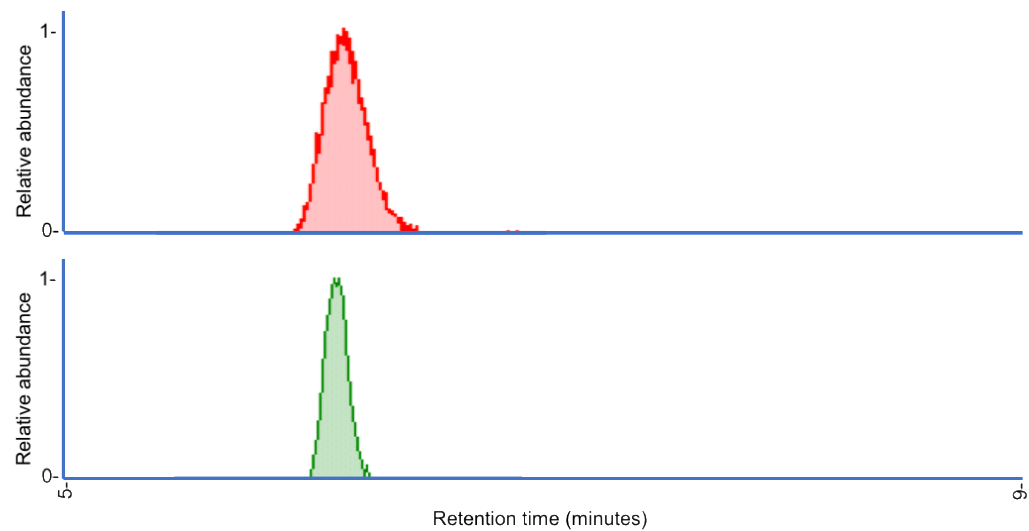

G.) Histamine

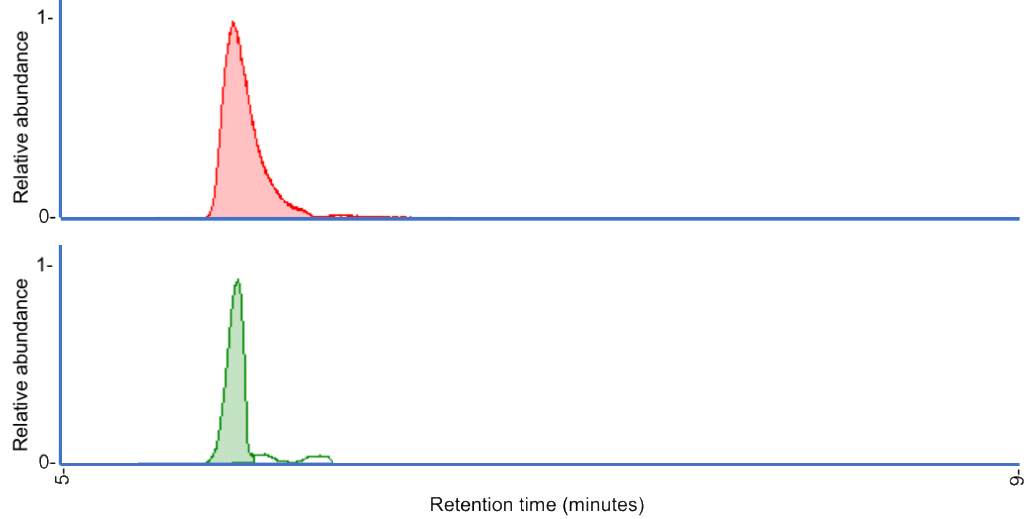

H.) Piperazine

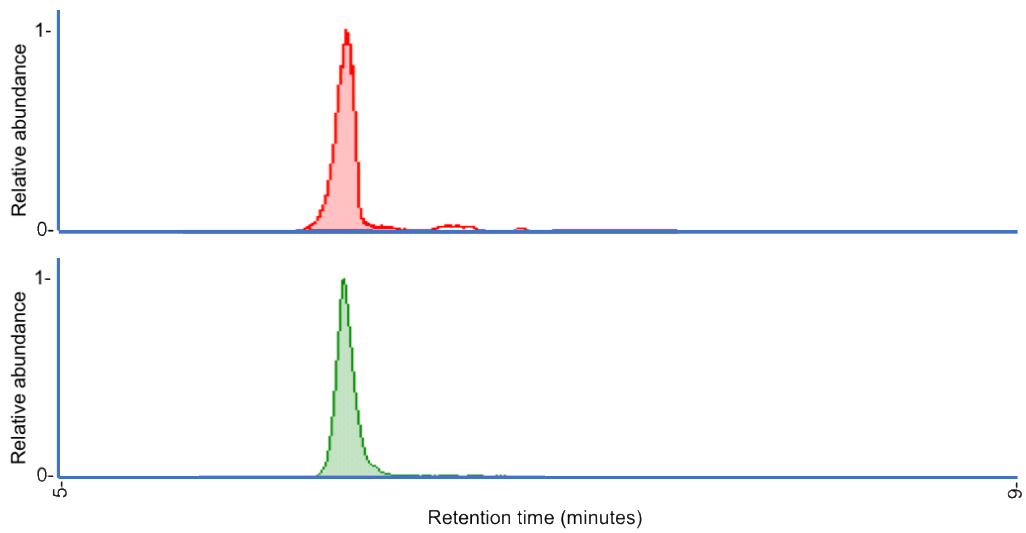

I.) Serotonin

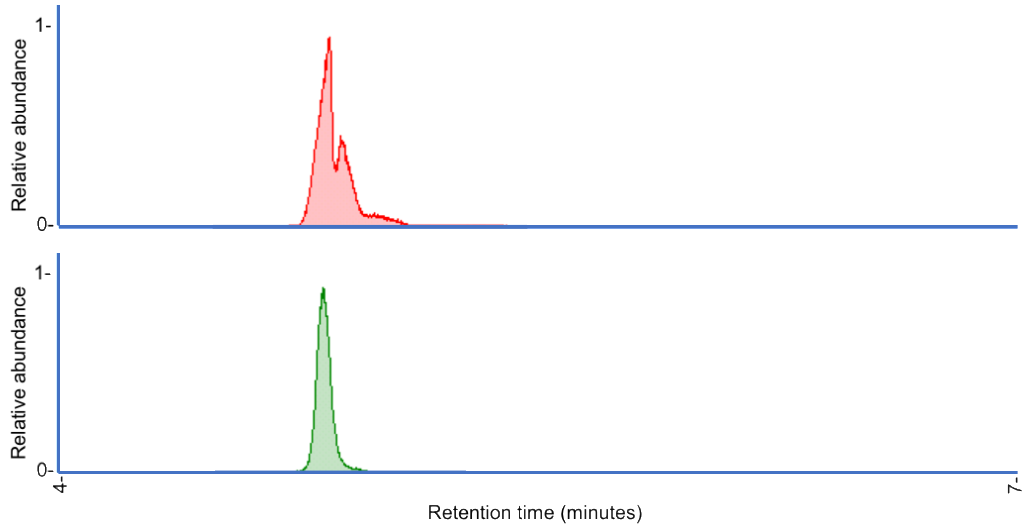

J.) Guanine

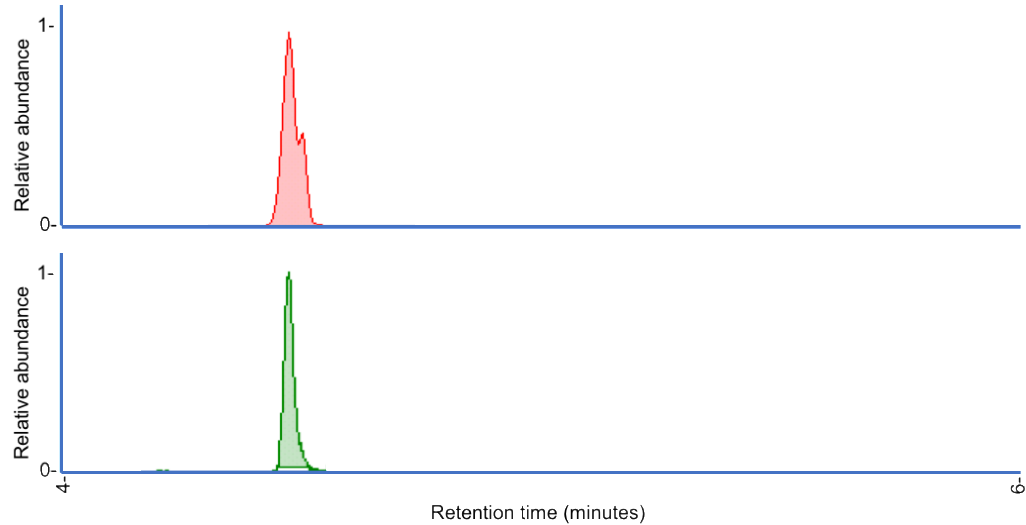

K.) Cidofovir

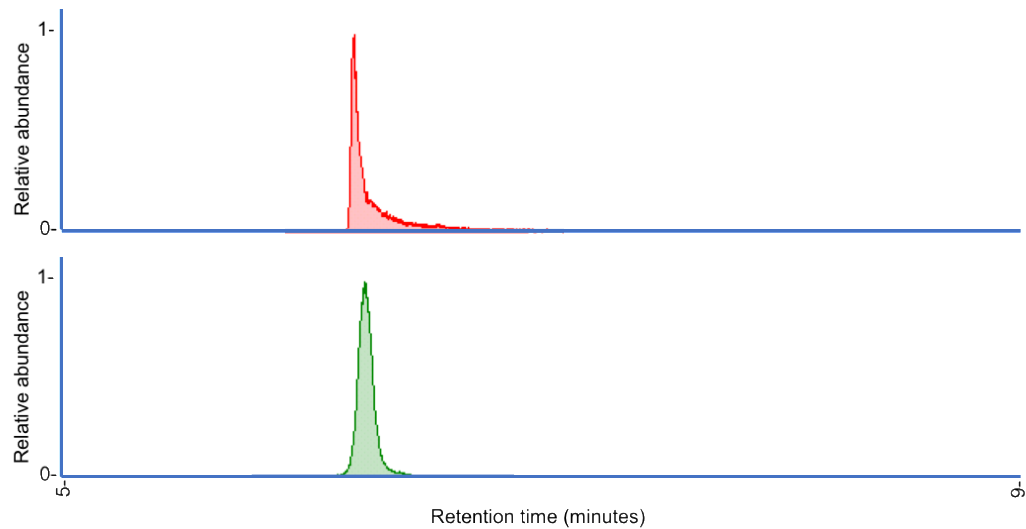

L.) 2-deoxyglucose 6-phosphate

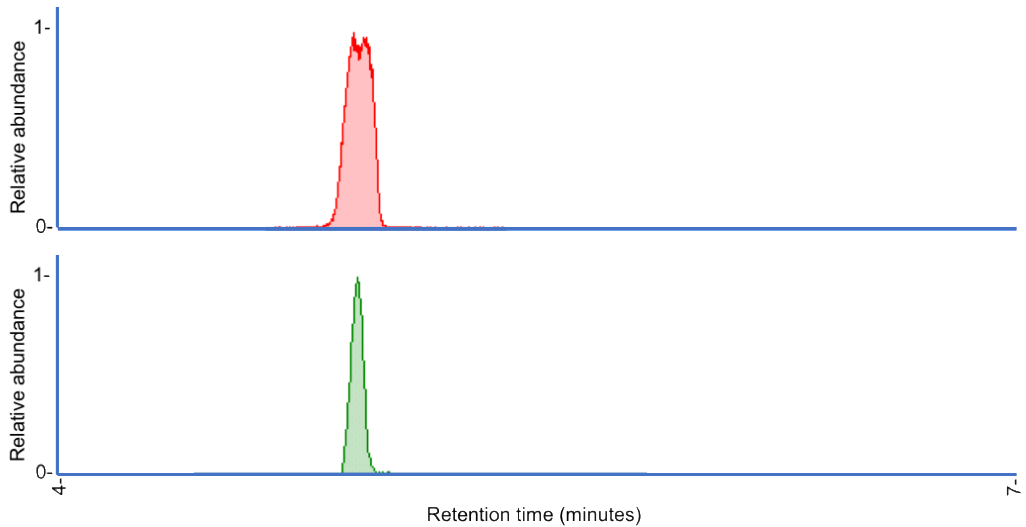

M.) 2-hydroxyglutarate

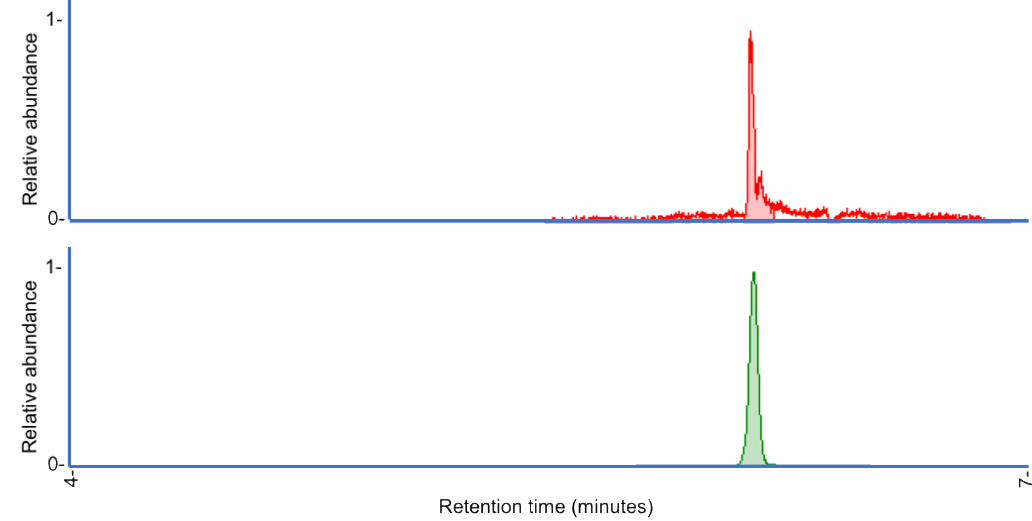

N.) ADP

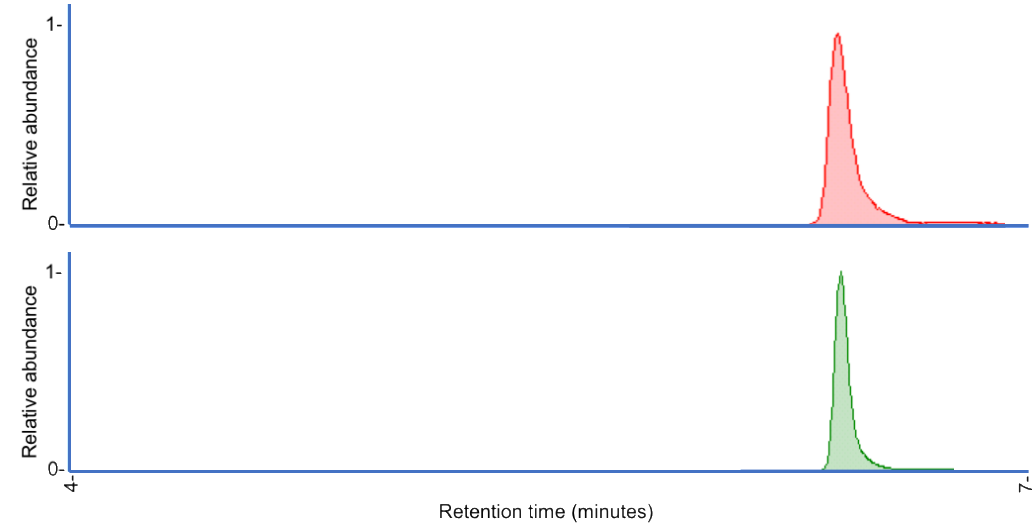

O.) D-myoinositol 4-phosphate

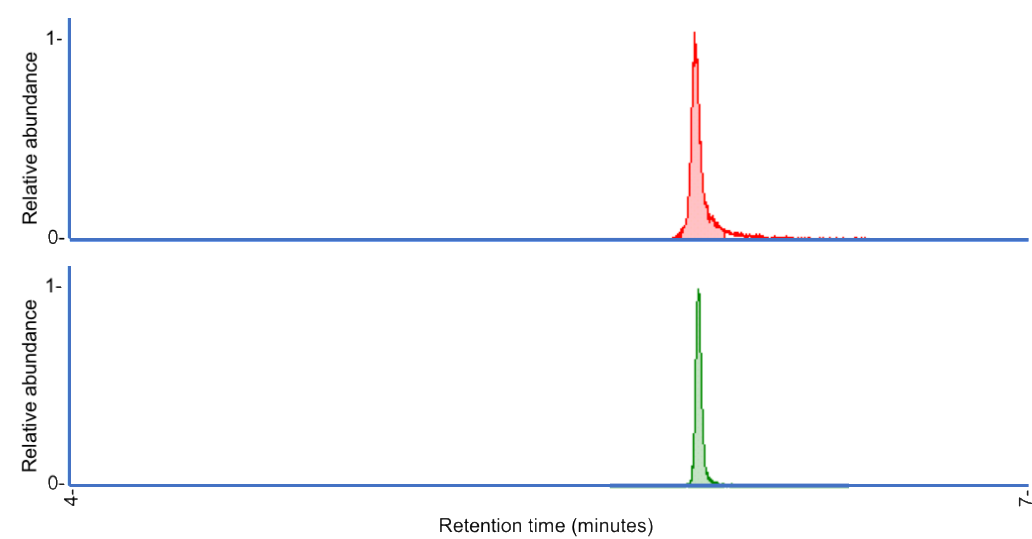

P.) Fucose 1-phosphate

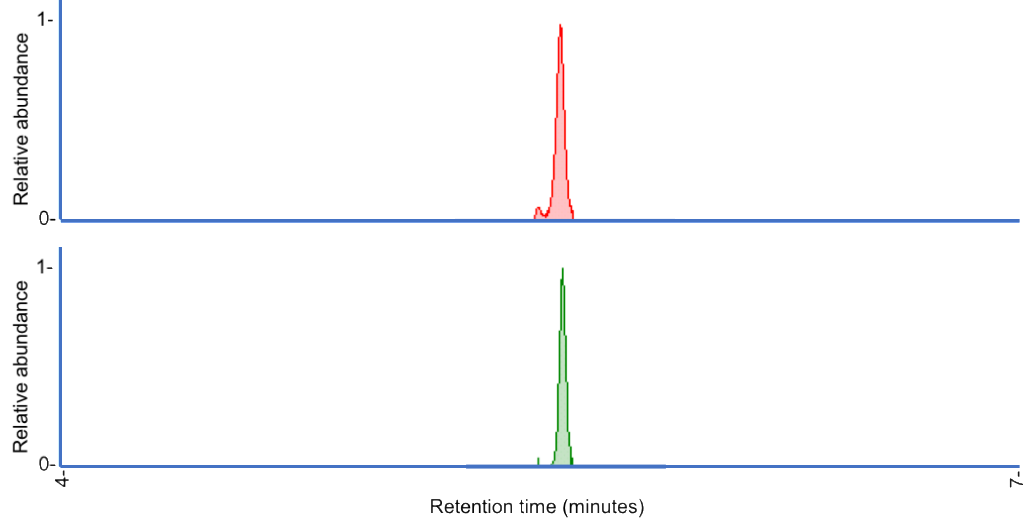

Q.) 2-PG

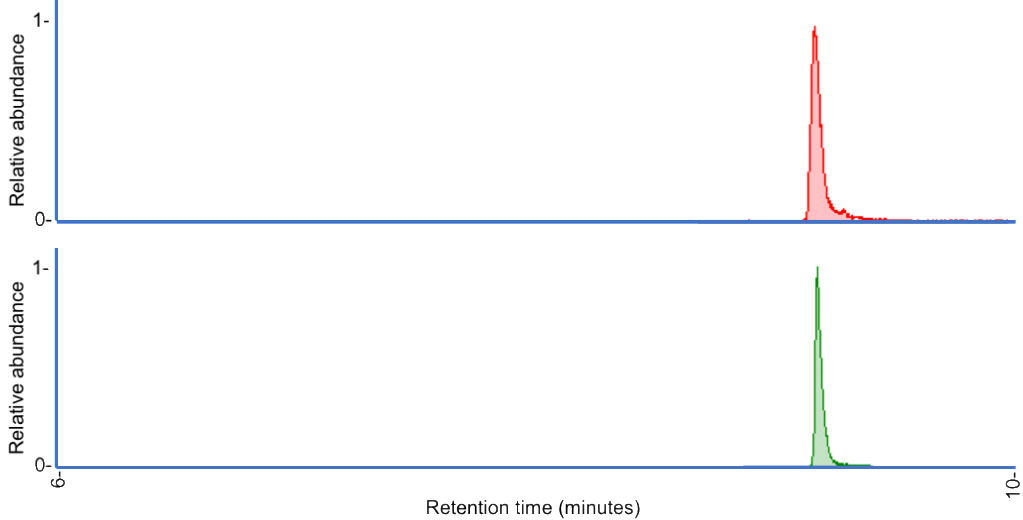

R.) 3-PG

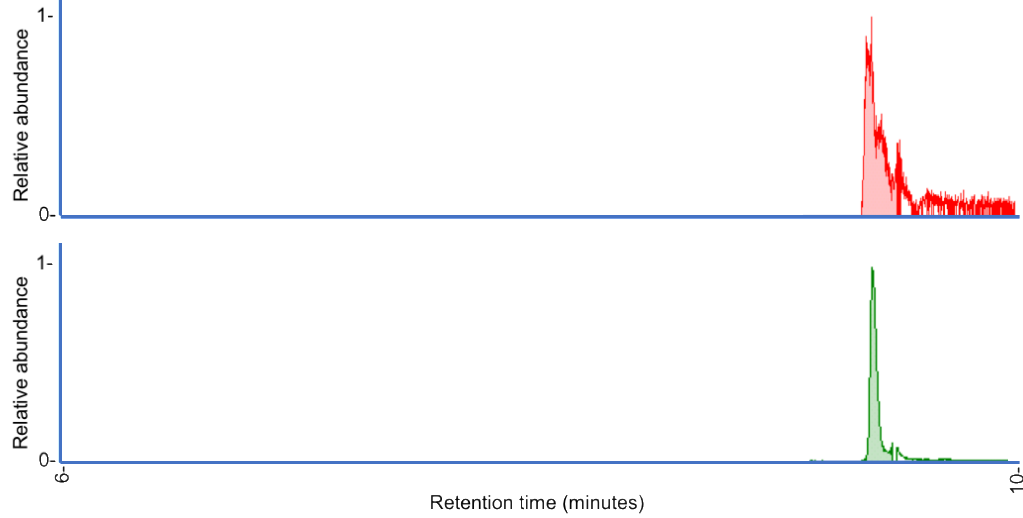

S.) ATP

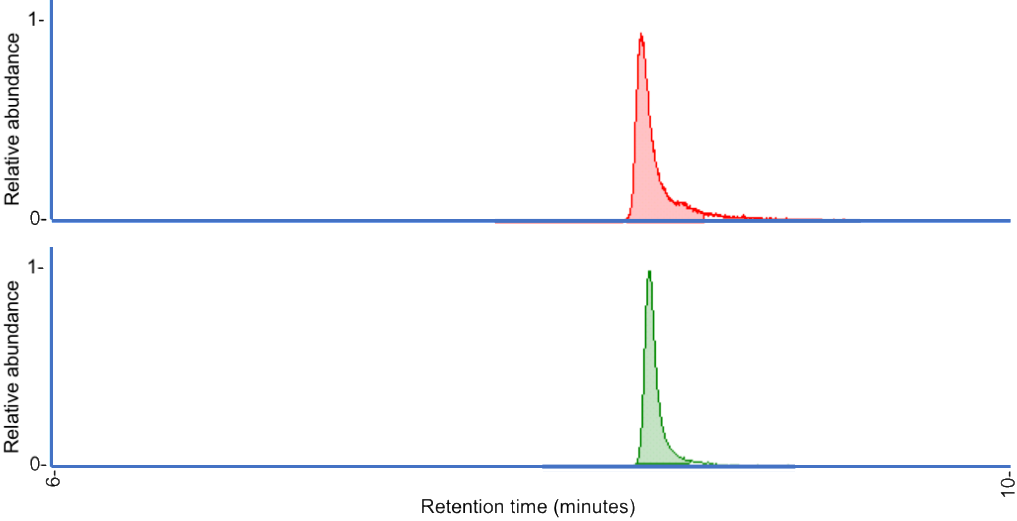

T.) Citrate

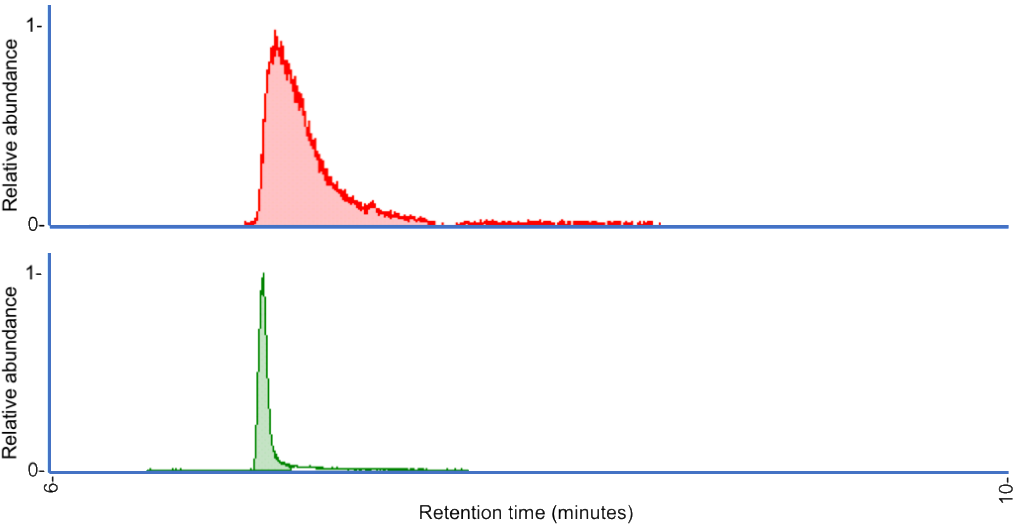

U.) Isocitrate

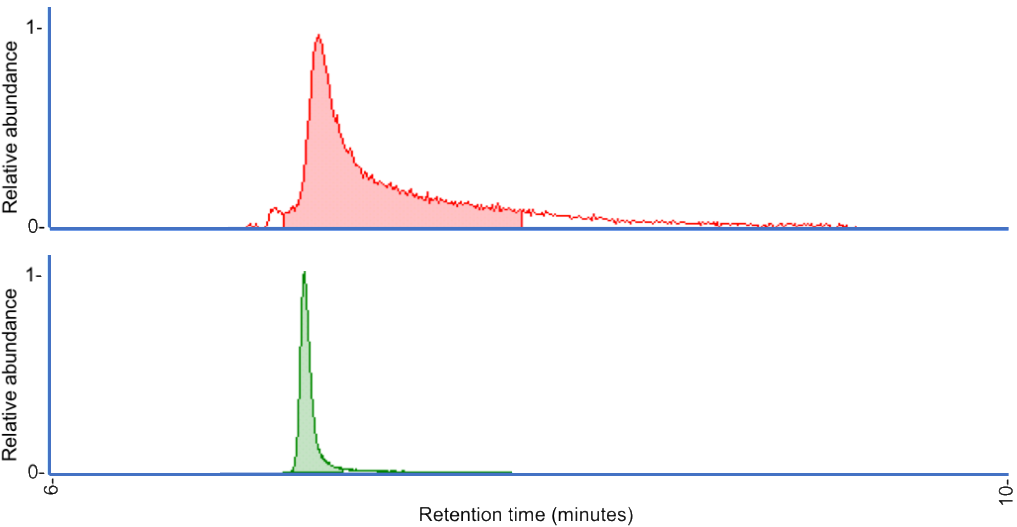

V.) Phosphoenolpyruvate

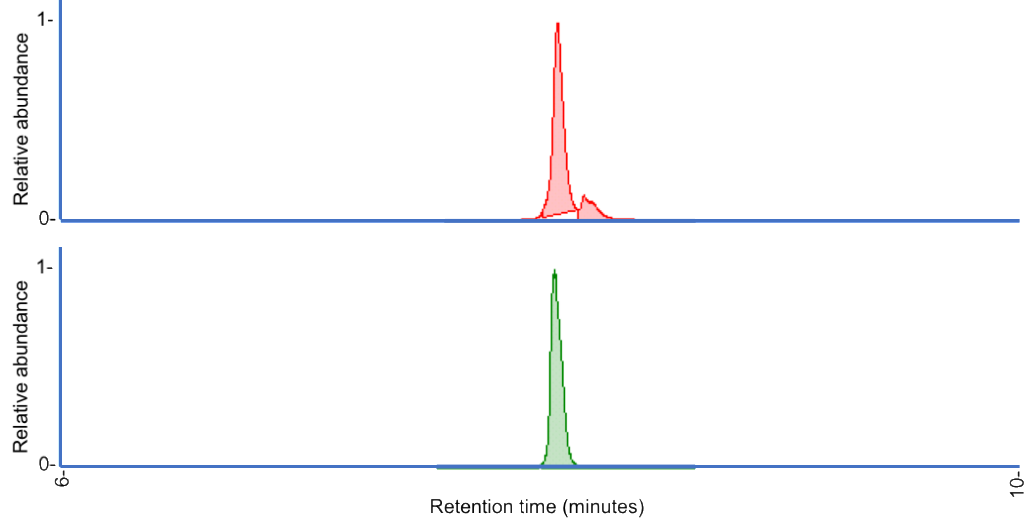

W.) Palmitoyl-CoA

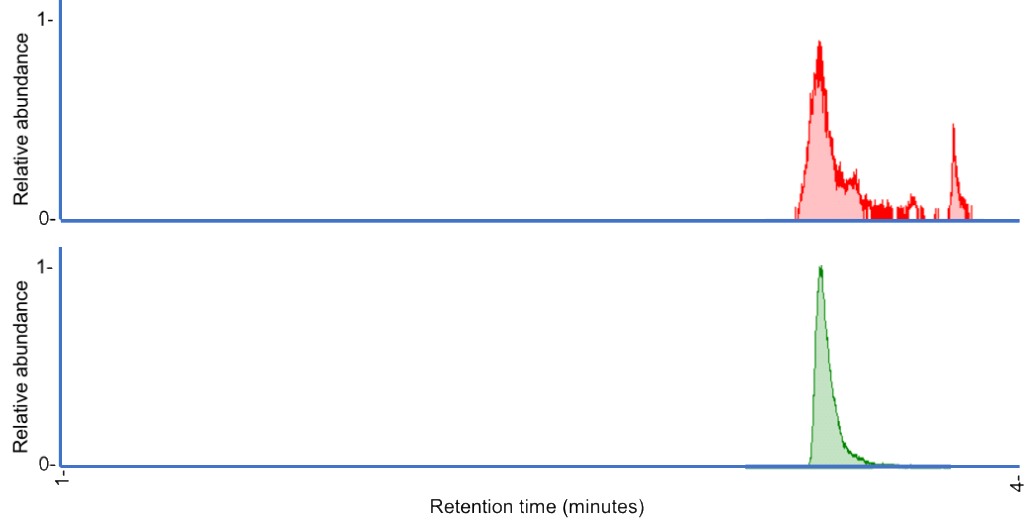

**Figure S4.** Heatmap of isomer resolution on ZIC-pHILIC stationary phase with and without 5  $\mu$ M phosphate in the mobile phase. Red indicates isomers that were not resolved. Green indicates completely resolved isomers.

| Isomer groups              | pHILIC No Phos | pHILIC With Phos |
|----------------------------|----------------|------------------|
| Adipic acid dihydrazide    | Green          | Green            |
| Arginine                   | Green          | Green            |
| 2'-deoxyguanosine          | Green          | Green            |
| 3'-deoxyguanosine          | Green          | Green            |
| Adenosine                  | Green          | Green            |
| Vidarabine                 | Green          | Green            |
| Fucose 1-phosphate         | Green          | Green            |
| 2-deoxyglucose 6-phosphate | Green          | Green            |
| Galactose                  | Green          | Green            |
| Glucose                    | Green          | Green            |
| 2-phosphoglycerate (2-PG)  | Red            | Green            |
| 3-phosphoglycerate (3-PG)  | Red            | Green            |
| Citrate                    | Red            | Green            |
| Isocitrate                 | Red            | Green            |



**Figure S5.** EICs of cidofovir when ammonium phosphate is in either the mobile phase or injection solvent. When phosphate is co-injected with cidofovir (bottom) instead of flowing in the mobile phase (top), peak tailing is reduced, and the peak is slightly more symmetrical.

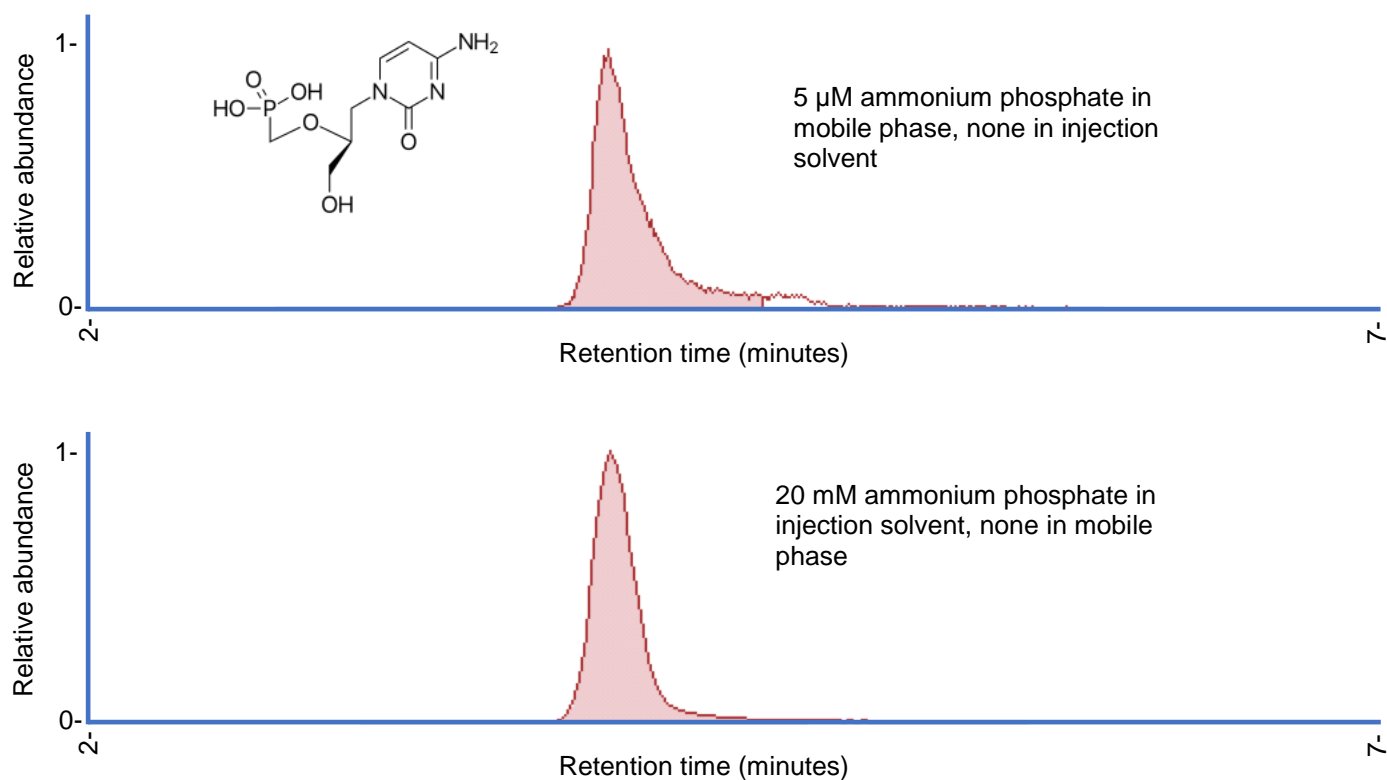

**Figure S6:** Effects of phosphate in the sample solvent on ZIC-pHILIC coverage, peak shape, and performance. Overall peak quality and coverage increased for the set of standards as detected using the ZIC-pHILIC stationary phase with and without 20 mM ammonium phosphate in the injection solvent. The results were nearly identical to using 5  $\mu$ M phosphate in the mobile phase.

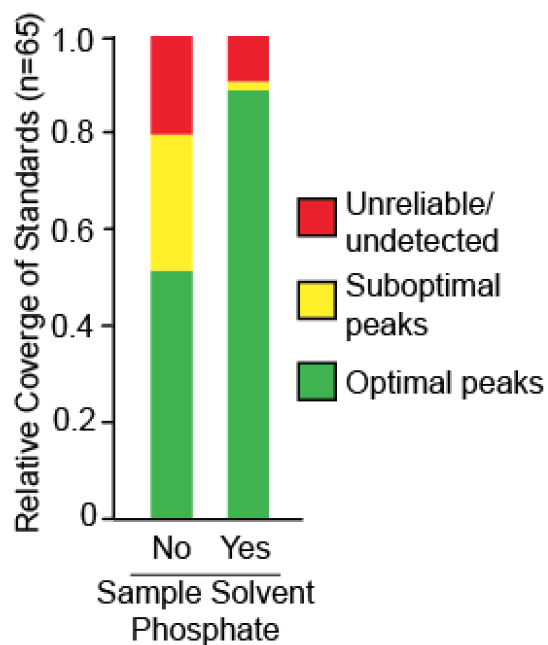

**Figure S7:** Ionization effects of trace phosphate on chemical standards. Standards were analyzed via direct infusion in the presence or absence of 5  $\mu\text{M}$  ammonium phosphate in the mobile phase to isolate phosphate's effects on ionization from chromatography. Each standard was analyzed with the ionization mode in which it ionized best, so as to remove redundancy. Data are normalized to the no-phosphate condition. On average, 5  $\mu\text{M}$  phosphate increased ionization efficiency by 6% for negatively ionizing compounds and 16% for positively ionizing compounds. These increases were not uniform. Phosphate increased signal by up to 50% for some compounds and decreased it by up to 25% for others. Higher concentrations of phosphate in the mobile phase ( $\geq 10 \mu\text{M}$ ) showed more ion suppression. In our LC method, whether introduced in the mobile phase or the sample solvent directly, phosphate generally eluted in a large peak about halfway through the gradient, with sub-detectable elution before the peak and constant very low-level elution after. Considered collectively, our results suggest that trace phosphate slightly improves ESI efficiency throughout most of our gradient, independent of its chromatographic effects, except during the elution of the main phosphate peak, at which point its ESI effects may be more suppressive.

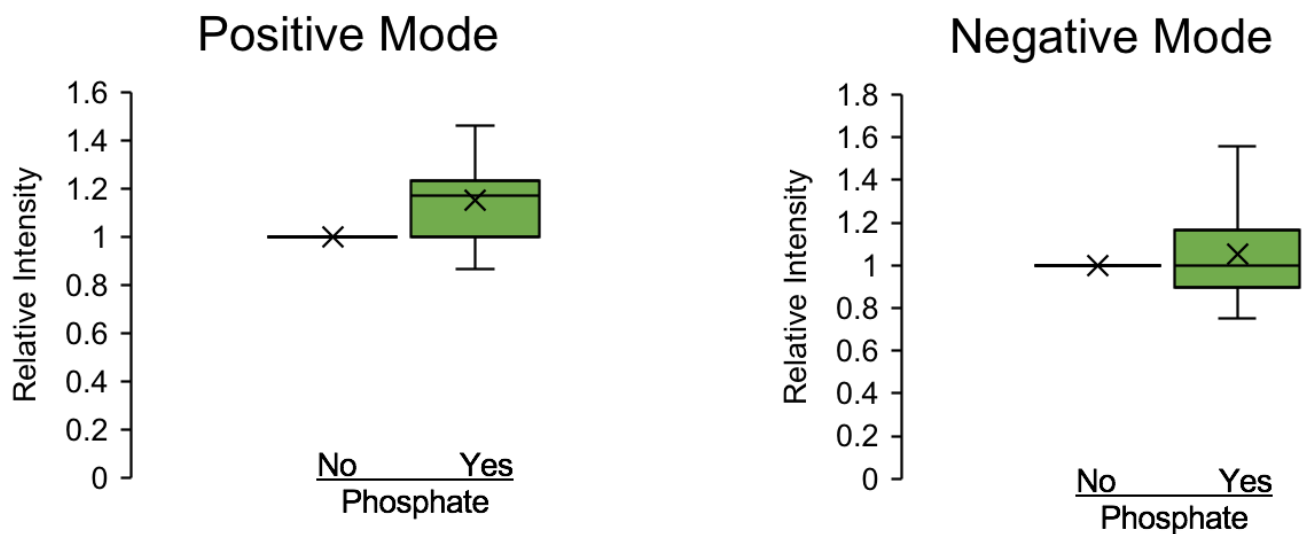

**Figure S8.** EICs of 2-PG from *credentialed E. coli* extracts. When 20 mM ammonium phosphate is included in the injection solvent (bottom), the 2-PG peak shape is improved. The peak width and shape of 2-PG with phosphate is within our *credentialing* parameters and was counted as a *credentialed* feature, whereas the wide, jagged peak shape without phosphate was not *credentialed*.

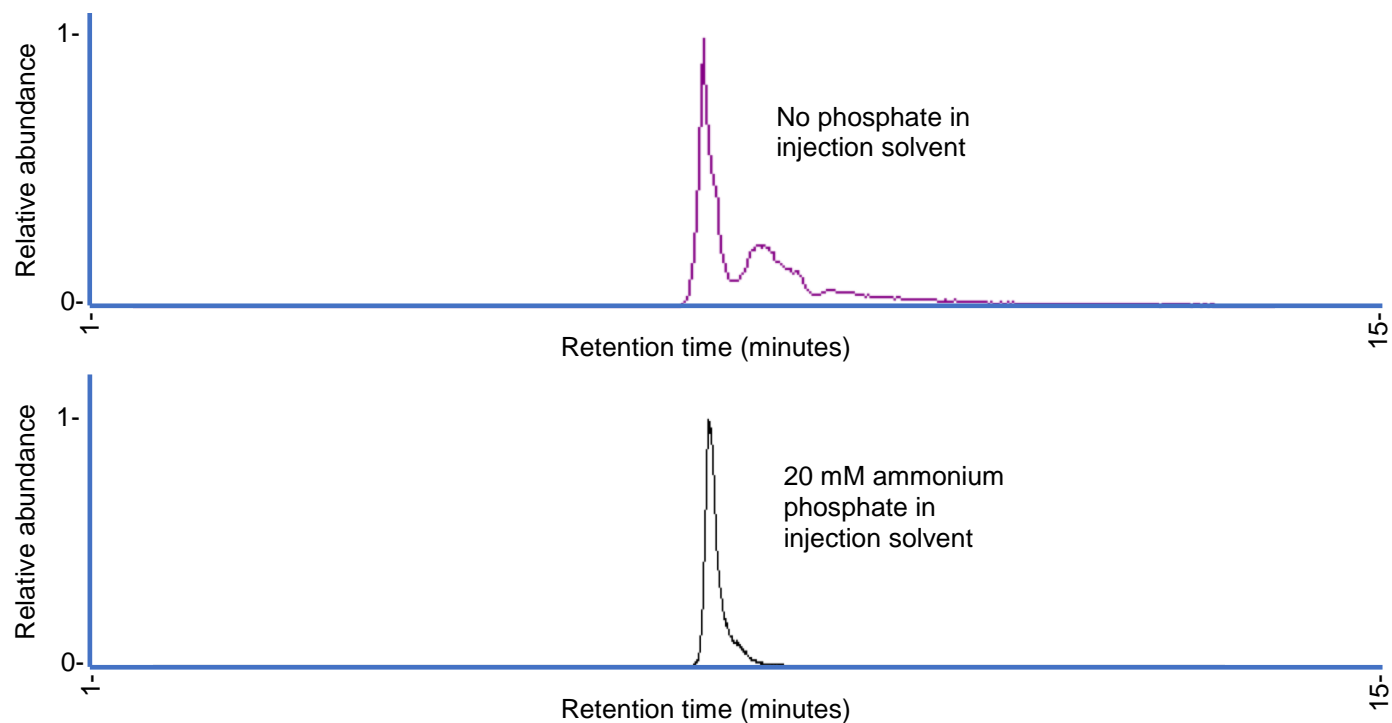

**Figure S9.** Heatmap of ten polar metabolites identified in *E. coli* extracts with excellent resolution on the ZIC-pHILIC when phosphate was present in the injection solvent. Inferior results were obtained when phosphate was omitted with the ZIC-pHILIC and when the Luna aminopropyl method was used. Red indicates that a standard was not detected above baseline noise. Orange indicates an unreliable peak with degradation in the form of significant band broadening, peak splitting, or asymmetry. Yellow indicates a quantitatively reliable peak with slight peak tailing, band broadening, or asymmetry. Green indicates an ideal peak shape.

Metabolites Detected in *E. coli*

| Compound                | Luna<br>NH2 | ZIC-pHILIC |          |
|-------------------------|-------------|------------|----------|
|                         |             | (-) phos   | (+) phos |
| Isocitrate              | Yellow      | Orange     | Green    |
| Pyruvate                | Red         | Green      | Green    |
| $\alpha$ -Ketoglutarate | Orange      | Green      | Green    |
| Uracil                  | Yellow      | Green      | Green    |
| Ribose 5-phosphate      | Yellow      | Yellow     | Green    |
| Glutamine               | Green       | Green      | Green    |
| Adenosine               | Yellow      | Green      | Green    |
| Glucose                 | Green       | Green      | Green    |
| Lactate                 | Green       | Green      | Green    |
| Succinate               | Green       | Green      | Green    |

**Figure S10.** EICs of 2-PG when analyzed without ammonium phosphate present (top) and with 20 mM ammonium phosphate injected onto the column prior to standard injection (bottom).

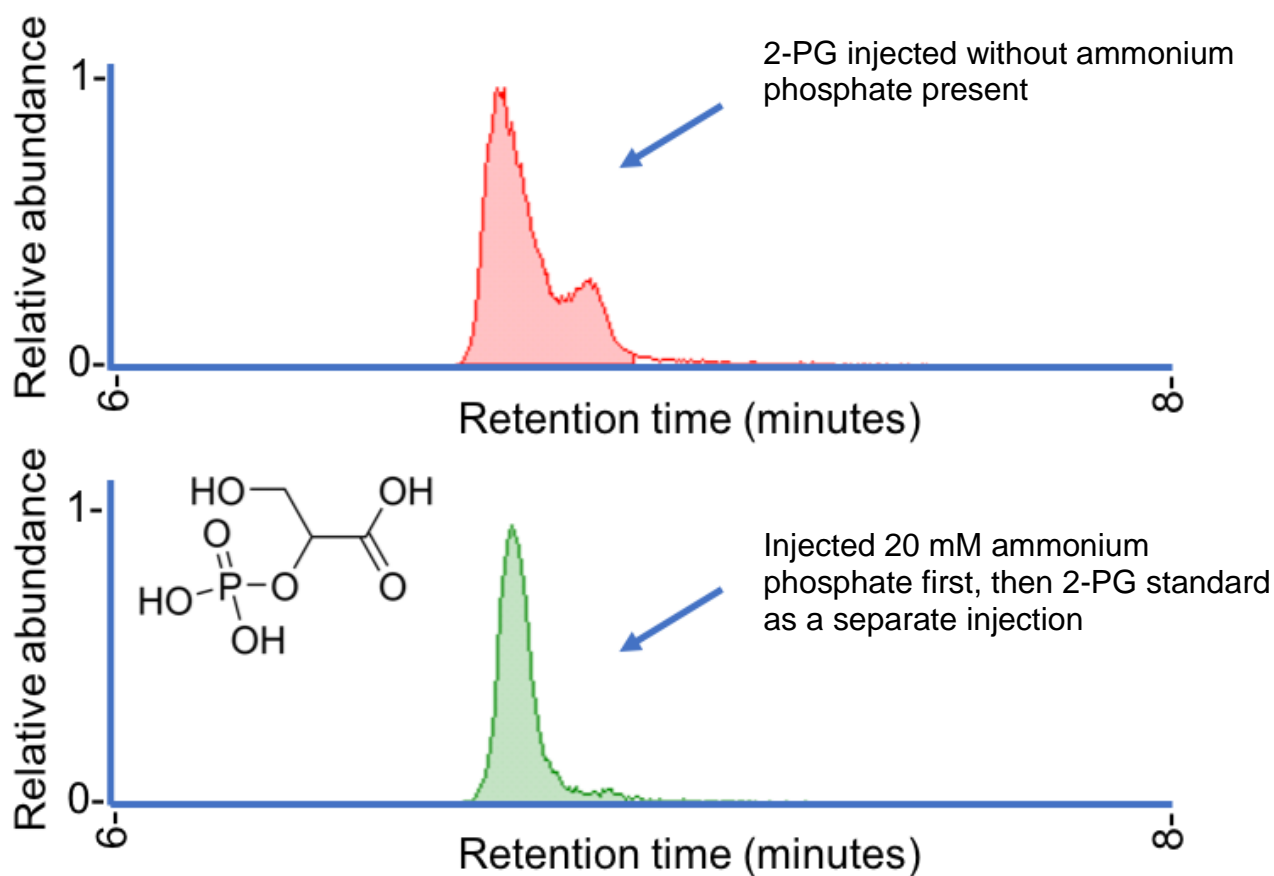

**Figure S11.** Effects of varying concentrations of mobile phase salt on ZIC-pHILIC performance. The bar graph shows that the relative peak height increases across the set of standards until 40 mM salt, which shows similar levels of ion suppression to the high salt conditions. The data shown are compiled from MS runs in positive and negative polarity. Compounds that eluted in the void volume were not considered in this analysis. Errors bars represent 95% confidence intervals.

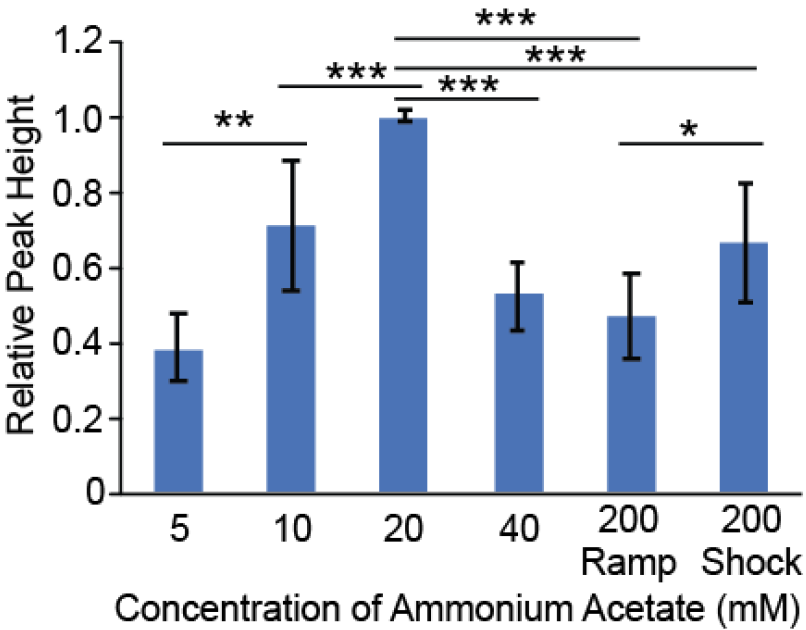

Supplement: Supplementary file 1 [file 13114070]
